# Supplementary material for: miR-455-3p ameliorates pancreatic acinar cell injury by targeting Slc2a1
Source: PeerJ journal article supplement (doi:10.7717/peerj.15612), 2023-06-30
Supplement: Raw_data.zip [file 4A-The overall pathological score.xlsx]

## Sheet: Sheet1
The overall pathological score
Control						AP
0	0	0	0	0	0	6	8	9	6	8	7
