# Supplementary material for: miR-455-3p ameliorates pancreatic acinar cell injury by targeting Slc2a1
Source: PeerJ journal article supplement (doi:10.7717/peerj.15612), 2023-06-30
Supplement: Raw_data.zip [file 5A-the expression level of miR-455-3p.xlsx]

## Sheet: Sheet1
the expression level of miR-455-3p
Control						AP
1.02	0.94	0.91	1.12	0.95	1.21	0.45	0.59	0.37	0.41	0.49	0.51
