# Supplementary material for: miR-455-3p ameliorates pancreatic acinar cell injury by targeting Slc2a1
Source: PeerJ journal article supplement (doi:10.7717/peerj.15612), 2023-06-30
Supplement: Raw_data.zip [file 6A-the expression level of miR-455-3p.xlsx]

## Sheet: Sheet1
the expression level of miR-455-3p
Control			AP			AP+miRNA-NC			AP+miR-455-3p mimics
0.95	1.03	0.91	0.45	0.41	0.37	0.41	0.36	0.45	1.51	1.43	1.59
