# Supplementary material for: miR-455-3p ameliorates pancreatic acinar cell injury by targeting Slc2a1
Source: PeerJ journal article supplement (doi:10.7717/peerj.15612), 2023-06-30
Supplement: Raw_data.zip [file 6E-Relative fluorescence intensity (%).xlsx]

## Sheet: Sheet1
Relative fluorescence intensity (%)
Control			AP			AP+miRNA-NC			AP+miR-455-3p mimics
101.26	95.47	103.68	181.24	174.51	186.45	179.62	183.26	174.54	148.33	153.62	157.21
