# Supplementary material for: miR-455-3p ameliorates pancreatic acinar cell injury by targeting Slc2a1
Source: PeerJ journal article supplement (doi:10.7717/peerj.15612), 2023-06-30
Supplement: Raw_data.zip [file 7B-the expression level of miR-455-3p.xlsx]

## Sheet: Sheet1
the expression level of miR-455-3p
miRNA-NC			miR-455-3p inhibitor			miR-455-3p mimics
1.02	0.95	1.11	0.51	0.39	0.47	2.98	3.02	2.87
