# Supplementary material for: miR-455-3p ameliorates pancreatic acinar cell injury by targeting Slc2a1
Source: PeerJ journal article supplement (doi:10.7717/peerj.15612), 2023-06-30
Supplement: Raw_data.zip [file 7D-the relative luciferase activity.xlsx]

## Sheet: Sheet1
the relative luciferase activity
	miRNA-NC			miR-455-3p mimics
pGL3-Slc2a1 -3’ UTR (WT)	0.95	1.02	1.08	0.51	0.43	0.39
pGL3-Slc2a1 mut -3’ UTR (MT)	0.98	1.11	0.94	0.95	1.07	1.01
