# Supplementary material for: miR-455-3p ameliorates pancreatic acinar cell injury by targeting Slc2a1
Source: PeerJ journal article supplement (doi:10.7717/peerj.15612), 2023-06-30
Supplement: Raw_data.zip [file 8A-the expression level of miR-455-3p.xlsx]

## Sheet: Sheet1
the expression level of miR-455-3p
Control			AP			AP+siNC			AP+siSlc2a1			AP+miRNA-NC+siSlc2a1			AP+miR-455-3p inhibitor+siSlc2a1
1.02	0.91	1.13	0.41	0.35	0.39	0.38	0.43	0.37	0.39	0.45	0.34	0.41	0.37	0.43	0.19	0.25	0.21
