# Supplementary material for: miR-455-3p ameliorates pancreatic acinar cell injury by targeting Slc2a1
Source: PeerJ journal article supplement (doi:10.7717/peerj.15612), 2023-06-30
Supplement: Raw_data.zip [file 8E-Relative fluorescence intensity (%).xlsx]

## Sheet: Sheet1
Relative fluorescence intensity (%)
Control			AP			AP+siNC			AP+siSlc2a1			AP+miRNA-NC+siSlc2a1			AP+miR-455-3p inhibitor+siSlc2a1
105.33	95.16	101.62	181.23	174.33	184.62	181.23	170.35	188.33	151.23	141.03	159.62	146.33	158.21	152.06	185.23	179.32	173.26
