# Supplementary material for: miR-455-3p ameliorates pancreatic acinar cell injury by targeting Slc2a1
Source: PeerJ journal article supplement (doi:10.7717/peerj.15612), 2023-06-30
Supplement: Raw_data.zip [file Fig.4B.xlsx]

## Sheet: Sheet1
amylase (U/L)
Control						AP
805.45	750.33	830.22	810.56	824.57	780.12	2548.12	2603.11	2495.64	2506.33	2597.47	2587.61
lipase (U/L)
Control						AP
105.62	91.26	123.16	99.56	101.65	110.33	1045.98	995.38	1089.47	1012.65	1065.16	1039.74
