# Supplementary material for: miR-455-3p ameliorates pancreatic acinar cell injury by targeting Slc2a1
Source: PeerJ journal article supplement (doi:10.7717/peerj.15612), 2023-06-30
Supplement: Raw_data.zip [file Fig.4C.xlsx]

## Sheet: Sheet1
TNF-α (pg/mL)
Control						AP
98.11	81.34	109.63	89.64	95.18	105.26	235.61	204.59	251.74	211.33	227.84	248.16
IL-1β (pg/mL)
Control						AP
78.41	67.25	88.56	71.33	79.06	90.12	209.15	197.64	216.78	190.31	221.78	214.74
IL-6 (pg/mL)
Control						AP
151.36	168.52	147.88	158.16	161.23	142.33	352.41	306.98	335.98	367.11	384.15	347.94
