# Supplementary material for: miR-455-3p ameliorates pancreatic acinar cell injury by targeting Slc2a1
Source: PeerJ journal article supplement (doi:10.7717/peerj.15612), 2023-06-30
Supplement: Raw_data.zip [file Fig.6F.xlsx]

## Sheet: Sheet1
TNF-α (pg/mL)
Control			AP			AP+miRNA-NC			AP+miR-455-3p mimics
51.26	45.61	53.47	120.31	112.35	129.62	125.33	121.31	111.65	95.41	90.21	101.03
IL-1β (pg/mL)
Control			AP			AP+miRNA-NC			AP+miR-455-3p mimics
9.51	7.12	5.61	25.61	30.02	29.41	26.51	30.14	28.74	20.12	22.06	18.41
IL-6 (pg/mL)
Control			AP			AP+miRNA-NC			AP+miR-455-3p mimics
25.61	31.02	35.11	101.02	95.31	110.33	94.51	106.21	99.06	71.03	65.21	76.02
