# Supplementary material for: miR-455-3p ameliorates pancreatic acinar cell injury by targeting Slc2a1
Source: PeerJ journal article supplement (doi:10.7717/peerj.15612), 2023-06-30
Supplement: Raw_data.zip [file Fig.8F.xlsx]

## Sheet: Sheet1
TNF-α (pg/mL)
Control			AP			AP+siNC			AP+siSlc2a1			AP+miRNA-NC+siSlc2a1			AP+miR-455-3p inhibitor+siSlc2a1
51.23	42.36	58.32	123.25	115.62	130.05	125.63	114.95	120.98	95.22	89.12	101.36	94.36	102.36	91.02	125.33	119.62	126.38
IL-1β (pg/mL)
Control			AP			AP+siNC			AP+siSlc2a1			AP+miRNA-NC+siSlc2a1			AP+miR-455-3p inhibitor+siSlc2a1
8.23	9.36	7.15	29.36	30.15	32.98	28.98	31.75	33.04	22.13	19.25	20.67	21.98	19.05	20.41	35.26	32.43	33.87
IL-6 (pg/mL)
Control			AP			AP+siNC			AP+siSlc2a1			AP+miRNA-NC+siSlc2a1			AP+miR-455-3p inhibitor+siSlc2a1
25.62	33.02	30.98	101.23	98.01	105.62	96.33	106.23	103.98	71.25	69.22	75.62	68.32	74.56	72.15	103.62	99.36	105.62
